# Supplementary material for: Management of interstitial pregnancy in the era of laparoscopy: a meta-analysis of 855 case studies compared with traditional techniques
Source: PubMed Central journal article supplement — Obstet Gynecol Sci. 2021 Feb 4;64(2):156–73. doi: 10.5468/ogs.20299 (PMC7990998; doi:10.5468/ogs.20299), 2021-02-04

**Supplementary Fig. 3.** Meta-regression model of operative time in the laparoscopy group.

## 2. Meta-regression model

Operative time in the laparoscopy group

Covariate(s): duration of amenorrhea

$R^2$  for Model 1, Random effects (MM), Z-Distribution, Mean

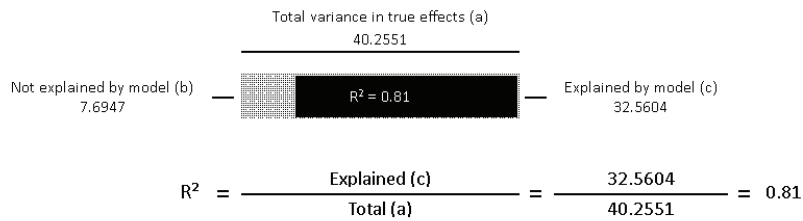

(a) To compute the total variance (of all studies about the grand mean) we run the regression with no covariates.

(b) To compute the variance not explained by the model (of all studies about the regression line) we run the regression with the covariates.

(c) The difference between these values gives us the variance explained by the model.

Scatter plot

**Regression of Mean on duration of amenorrhea**

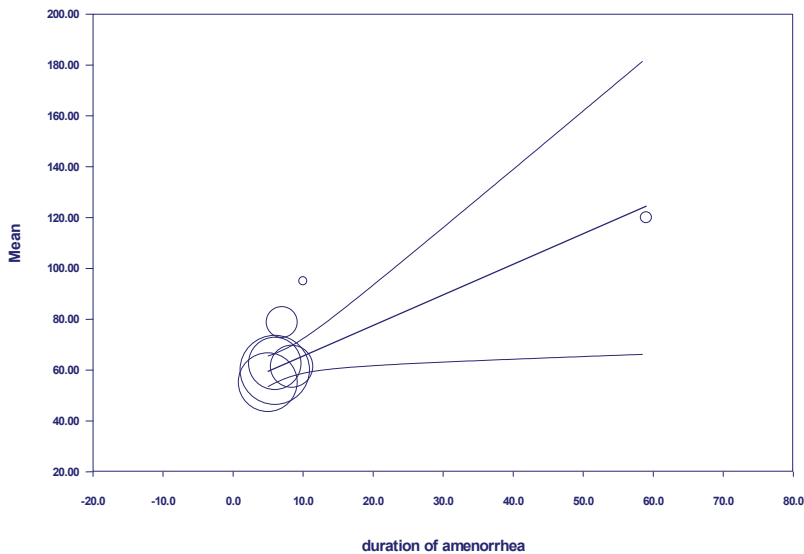

Supplement: ogs-20299-suppl3.pdf [file ogs-20299-suppl3.pdf]
