# Supplementary material for: Management of interstitial pregnancy in the era of laparoscopy: a meta-analysis of 855 case studies compared with traditional techniques
Source: PubMed Central journal article supplement — Obstet Gynecol Sci. 2021 Feb 4;64(2):156–73. doi: 10.5468/ogs.20299 (PMC7990998; doi:10.5468/ogs.20299), 2021-02-04

## Supplementary Fig. 5. Meta-regression model of hospital stay in the laparoscopy group.

### 3. Meta-regression model

Hospital stay in the laparoscopy group

Covariate(s): Gravidity & year

R<sup>2</sup> for Model 1, Random effects (MM), Z-Distribution, Mean

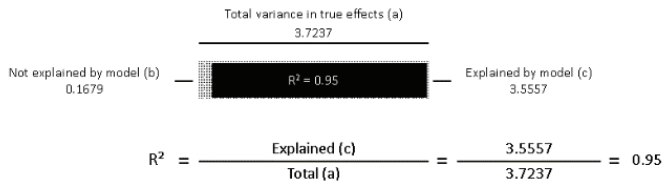

- (a) To compute the total variance (of all studies about the grand mean) we run the regression with no covariates.
- (b) To compute the variance not explained by the model (of all studies about the regression line) we run the regression with the covariates.
- (c) The difference between these values gives us the variance explained by the model.

Scatter plot

Year

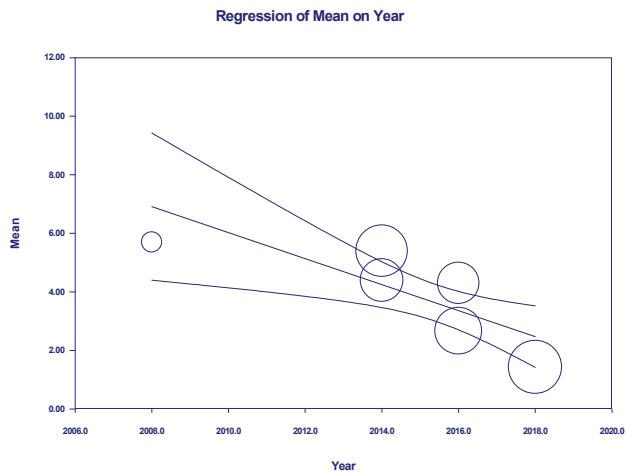

Gravidity

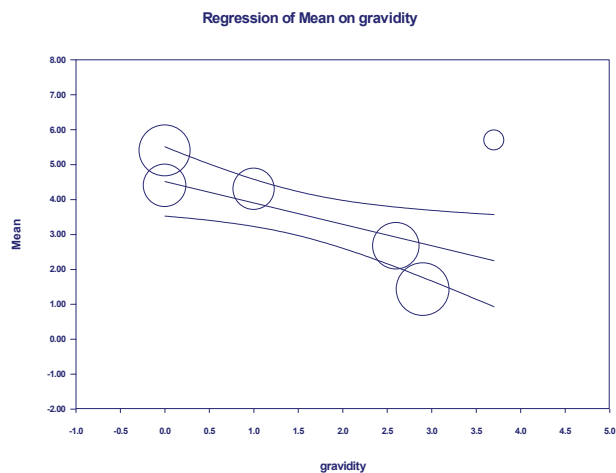

Supplement: ogs-20299-suppl5.pdf [file ogs-20299-suppl5.pdf]
