# Supplementary material for: Management of interstitial pregnancy in the era of laparoscopy: a meta-analysis of 855 case studies compared with traditional techniques
Source: PubMed Central journal article supplement — Obstet Gynecol Sci. 2021 Feb 4;64(2):156–73. doi: 10.5468/ogs.20299 (PMC7990998; doi:10.5468/ogs.20299), 2021-02-04

# Obstetrics & Gynecology Science

Greg Marchand, et al. Systematic review of laparoscopy in interstitial pregnancy

**Supplementary Fig. 7.** Cumulative meta-analysis of hospital stay. CI, confidence interval.

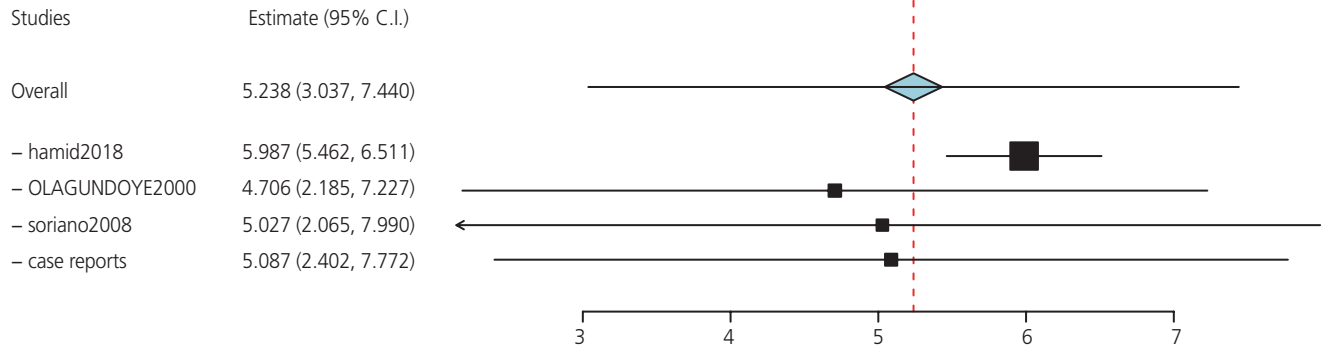

Supplement: ogs-20299-suppl7.pdf [file ogs-20299-suppl7.pdf]
