# Supplementary figures and images for: Management of interstitial pregnancy in the era of laparoscopy: a meta-analysis of 855 case studies compared with traditional techniques
Source: PubMed Central journal article supplement — Obstet Gynecol Sci. 2021 Feb 4;64(2):156–73. doi: 10.5468/ogs.20299 (PMC7990998; doi:10.5468/ogs.20299), 2021-02-04

**Supplementary Fig. 8.** Cumulative meta-analysis of incidence of rupture. CI, confidence interval.

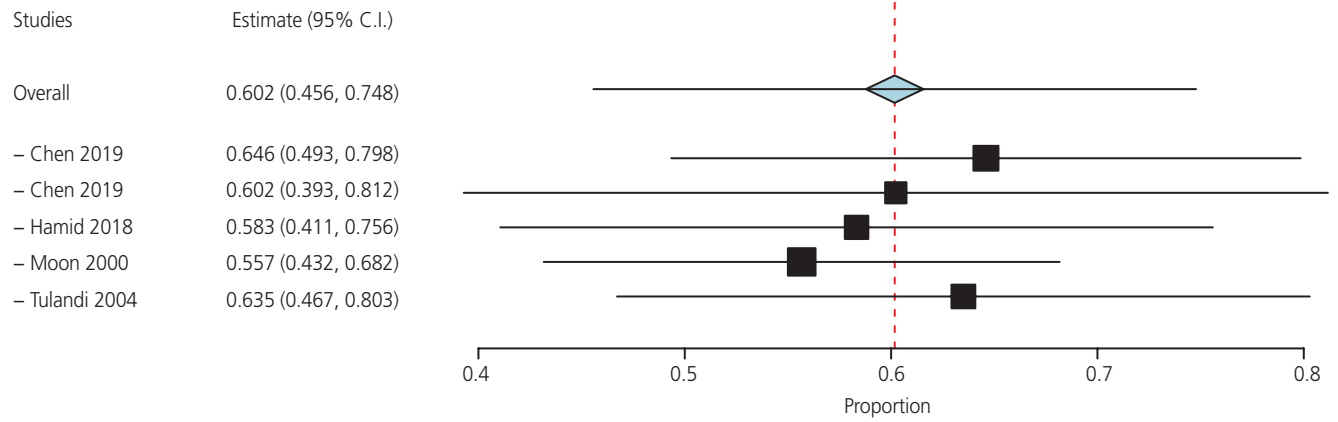

Supplement: ogs-20299-suppl8.pdf [file ogs-20299-suppl8.pdf]
